# Supplementary material for: Systems thinking for health emergencies: use of process mapping during outbreak response
Source: HighWire-hosted journal article supplement (doi:10.1136/bmjgh-2020-003901), 2020-10-01
Supplement: bmjgh-2020-003901supp001_data_supplement.pdf [file bmjgh-2020-003901supp001_data_supplement.pdf]

Chart 1: Proposed Solutions

|                                                               | <b>Challenge</b>                           | <b>Proposed Solution</b>                                                                                                                                                         |
|---------------------------------------------------------------|--------------------------------------------|----------------------------------------------------------------------------------------------------------------------------------------------------------------------------------|
| <b>Case Study 1:<br/>Sierra Leone</b>                         | Result delay,<br>Communication             | train surveillance officers on how to complete the case investigation forms (CIF) and explain the implications associated with not filling them out completely                   |
|                                                               | Result delay,<br>Information system        | give each HC/ETU a unique rubber stamp with the name of the unit and an identifier so that all lab requests could be traced and training staff on proper use of the stamps       |
|                                                               | Result delay                               | establish a sample distribution and routing plan                                                                                                                                 |
|                                                               | Human resources                            | develop and train additional data entry and management support                                                                                                                   |
|                                                               | Communication                              | identify clear roles and responsibilities for staff at laboratories, ETU's, and HC's                                                                                             |
|                                                               | Information system                         | standardize data collection forms between all facilities                                                                                                                         |
|                                                               | Result delay                               | streamline the relay of results                                                                                                                                                  |
|                                                               | Human resources                            | hire dedicated data managers to manage the flow of results                                                                                                                       |
|                                                               | Information system                         | develop a national consolidated database                                                                                                                                         |
| <b>Case Study 2:<br/>Democratic<br/>Republic of<br/>Congo</b> | Process/procedures,<br>information sharing | decentralize activities down to a health zone level                                                                                                                              |
|                                                               | Process/Procedures                         | develop processes and procedures to improve the flow of data with roles, responsibilities, and timelines                                                                         |
|                                                               | Information system                         | merge databases maintained separately by the Classification Committee, INRB, and WHO into one cleaned, central database                                                          |
|                                                               | Human Resources                            | hire a data entry clerk at the national level so that data managers and epidemiologists can prioritize the cleaning and consolidation of the database                            |
|                                                               | Human Resources                            | recruit and train additional data management staff to support data collection, data entry, ongoing and retrospective cleaning, consolidation of data, and data analysis          |
|                                                               | Information sharing,<br>system             | create a Datamart to quickly upload and share the consolidated database from the WHO country office in DRC to regional and global levels                                         |
| <b>Case Study 3:<br/>Nigeria</b>                              | Data collection,<br>communication          | educate all state epidemiologists about monkeypox disease and the current outbreak                                                                                               |
|                                                               | Data collection,<br>communication          | classify and provide feedback on CIFs submitted to the national level within the same day                                                                                        |
|                                                               | Information system                         | analyze completeness of data and report back to the State to promote the reporting of accurate and complete data                                                                 |
|                                                               | Data collection                            | the laboratory would utilize a standardized lab form and send the results to the lab lead at the national level within a determined time period                                  |
|                                                               | Information system                         | two data managers would ensure all data from the CIF were entered daily into an Epi Info database which had both lab and epi data linked and cleaned                             |
|                                                               | Information system                         | map data on a daily basis and report findings to understand geographic movement                                                                                                  |
|                                                               | Communication                              | a daily lab/surveillance/data meeting would be established to address all technical issues                                                                                       |
|                                                               | Communication                              | develop a standardized PowerPoint slide deck to ensure key points were communicated during the daily incident management meeting (promote information sharing and collaboration) |
